## The most informative neural code accounts for population heterogeneity

Elizabeth Zavitz<sup>1,2,3</sup>, Hsin-Hao Yu<sup>1,2</sup>, Marcello GP Rosa<sup>1,2,3</sup>, Nicholas SC Price<sup>1,2,3</sup>

- (1) Department of Physiology, Monash University, Melbourne, Victoria, Australia
- (2) Biomedicine Discovery Institute, Monash University, Melbourne, Victoria, Australia
- (3) ARC Centre of Excellence in Integrative Brain Function

### **Corresponding Author:**

Elizabeth Zavitz  
elizabeth.zavitz@monash.edu

### **Competing interests:**

The authors have declared that no competing interests exist.

### **Funding:**

This work was funded by Australia's National Health and Medical Research Council, the Human Frontier Science Program, and the Australian Research Council.

### **Author Contributions:**

EZ and NSCP designed the study, EZ, HHY, MGPR, and NSCP ran the experiments, EZ performed the analysis and modelling, EZ and NSCP wrote the paper.

## 1 Abstract

2 Sensory perception depends on the accurate representation of the external world by  
3 neuronal populations. Each neuron's contribution to a population code depends on its tuning  
4 preferences, but neuronal populations are heterogeneous: their spiking rate, spiking  
5 variability and tuning selectivity are all different. To understand how this heterogeneity  
6 impacts a neuron's contribution to the population code, we recorded responses to moving  
7 stimuli from motion-sensitive neurons in anaesthetized marmosets (*Callithrix jacchus*) and  
8 trained linear decoders to discriminate direction using these responses. The relationship  
9 between a neuron's preferred direction and the discrimination boundary was the strongest  
10 predictor of its decoding weight, and highly direction selective neurons are the most useful in  
11 the population code. Millisecond-timescale changes in neuronal responses mean that  
12 optimal weights change rapidly; however, perceptual readouts do not have this fine-grained  
13 temporal flexibility, and must perform sub-optimal decoding at each point in time.

## 14 Author Summary

15 It is widely understood that perception depends upon interpreting, or decoding, the pattern of  
16 activity across a neuronal population. To do this, firing rates from hundreds of sensory  
17 neurons must be weighted and combined to accurately represent stimulus properties.  
18 Despite the reality of a diverse, heterogeneous population of neurons, all we know is that  
19 their weighting is a function of the relationship between their tuning preference, and the  
20 decoding decision or perceptual task under consideration. In this manuscript we ask: which  
21 neurons in a heterogeneous population are the most informative, can their usefulness can  
22 be predicted by their response properties, and to what degree can we expect them to be  
23 optimized? We addressed this question using a machine learning approach to learn how to  
24 weight each neuron's response in order to perform a range of discrimination tasks, and fit a  
25 series of decoding models to show that models based on preferred direction alone are  
26 significantly improved if neurons that are more selective are weighted more strongly. These

27 results show that we can perform better decoding without machine learning if we address  
28 the false assumption that all members of the neural population are equally informative.

## 29 Introduction

30 Each of our perceptions is not a reflection of the activity of a single neuron, but an  
31 interpretation of the aggregate activity across a population of neurons. Firing rates from  
32 ensembles of hundreds of neurons must be weighted and combined to accurately represent  
33 stimulus properties. We understand some aspects of how a perceptual ‘readout’ may be  
34 produced from this population activity, such as how neurons with different tuning  
35 preferences can be weighted and evaluated in order to make discriminations (1–3) or to  
36 identify where a stimulus lies on a continuous scale (4,5). Often, the neural population is  
37 idealized as a sequence of identical bell-shaped tuning curves whose peaks are offset from  
38 one another to uniformly tile the stimulus space. In this case it is reasonable for every  
39 neuron to contribute equally to the readout. However, cortical neurons are diverse: within a  
40 single brain area they vary in sharpness of tuning, selectivity, overall firing rates, and trial-to-  
41 trial variability (6). Here we address the problem of optimal coding in a heterogeneous  
42 population by asking which neurons are the most informative, whether their usefulness can  
43 be predicted by their response properties, and to what degree we can expect them to be  
44 optimized.

45 Within the brain, the firing rate of a given neuron depends on the firing rate of its inputs, and  
46 the relative weighting of each input. This weighting is governed by the strength of synaptic  
47 connections from each input neuron. In the context of sensory decision making, the  
48 magnitude of a neuron’s synaptic weight indicates the amount to which it contributes to a  
49 decision. A computational decoder emulating a decision making process thus represents the  
50 activity of readout neurons that receive inputs from a large population of sensory neurons,  
51 and its weights are analogous to synaptic weights (7). To decode neural activity  
52 computationally, each neuron may be assigned multiplicative weights *a priori*, based on  
53 known attributes of the neurons such as preferred direction. This is done often in theoretical

54 contexts: all neurons are assumed to be identical aside from their tuning preference, and  
55 they are assigned weights based on that preference alone. Alternately, weights may be  
56 derived with machine learning approaches. As expected (8), the weights that individual  
57 neurons are assigned by decoders trained to perform fine discrimination tasks are highest  
58 when the individual tuning curves have the most discriminatory power because their tuning  
59 curves are steep or have relatively low inter-trial variability (1,9). Even after accounting for  
60 this relationship, there is still a significant amount of variability in the weights that neurons in  
61 heterogeneous populations are assigned.

62 How a decoding model's performance varies over time can provide meaningful insight into  
63 how optimal neural coding may be. When decoders are trained and tested at matching time  
64 points throughout the stimulus response, their weights are optimized to the responses at  
65 each time (9,10). However, spike-rate adaptation following strong stimulus drive is  
66 associated with changes in firing rates and tuning properties. These stimulus-specific  
67 changes in firing rate result in perceptual errors (11). If the weights that neural circuits use to  
68 decode population activity are continuously and rapidly updated, adaptation would not affect  
69 perception because the readout would be continually optimized to produce an accurate  
70 percept. That we observe adaptation-related effects in a multitude of contexts and modalities  
71 suggests that readout weightings are stable over short timescales (12), and thus that coding  
72 is not optimal over the same time scales.

73 In this paper, we used the responses from heterogeneous populations recorded in area MT  
74 of the non-human primate visual cortex to examine how the direction of moving patterns is  
75 encoded by neural populations. To determine which neurons are most informative, we  
76 derived weights for each neuron using a machine learning model. We compared these  
77 weights against the tuning properties of each neuron in order to predict which neurons will  
78 be useful. We found that direction selectivity both predicted the weight of the recorded  
79 neurons, and enhanced the performance of *a priori* decoding models (in which weights are  
80 pre-defined, rather than learned), independent of the readout decision (identification or

81 discrimination), and population size. Our results suggest that those neurons that are highly  
82 selective contribute the most to the population code, and that little optimization in weights is  
83 needed for the predicted perceptual errors between trials to equal the degree of error that is  
84 tolerated over time.

## 85 Results

86 The activity across a population of neurons is weighted and interpreted to produce  
87 perceptual experiences. In the context of motion processing, theoretical and empirical  
88 methods have demonstrated that a neuron's utility in a population code depends primarily on  
89 its preferred direction, but how other response characteristics impact population coding is  
90 unknown.

91 To assess how response properties other than preferred direction influence coding weight,  
92 we recorded extracellular responses from motion-sensitive neurons in the middle temporal  
93 area (MT) of four anaesthetized common marmosets (*Callithrix jacchus*) while we displayed  
94 moving dot patterns. The stimulus dots moved coherently in one of 12 directions for 500 ms  
95 before a 500 ms blank period, and each direction was repeated 120 times. We combined  
96 trial-shuffled responses for 136 single units, then applied a supervised learning algorithm to  
97 decode them based on one of three schemes. Fine and coarse two-alternative  
98 discriminations were decoded based on a binomial generalized linear model (Figure 1A),  
99 and 12-alternative identification was decoded based on a multinomial generalized linear  
100 model (Figure 1B).

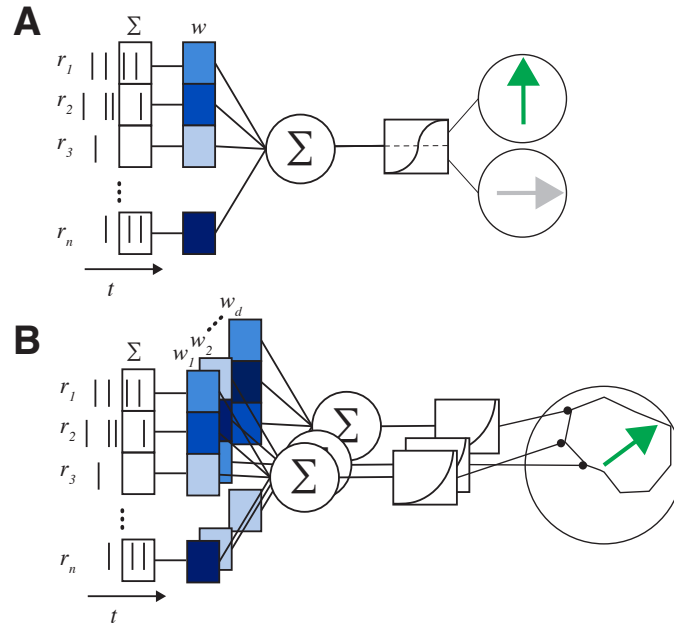

101

102 **Figure 1: Decoding neural population activity. (A)** Schematic of the two-alternative  
 103 bimodal generalized linear model. The spiking responses ( $r$ ) of a population of  $n$  neurons are  
 104 integrated in a spike counting window, multiplied by a weight ( $w$ ), summed, transformed,  
 105 then compared to a criterion. Therefore every pattern of spike counts predicts one of the two  
 106 possible directions. **(B)** Schematic of the identification multinomial generalized linear model.  
 107 In this model, spike counts are weighted, integrated and transformed multiple times: once for  
 108 each possible stimulus direction category. These responses are subsequently combined  
 109 using a vector average to produce a direction prediction on a continuous scale. Continuous  
 110 estimates within  $\pm 15^\circ$  of the stimulus were considered 'correct'.

111 The purpose of the supervised learning process is to choose weights to apply to each  
 112 neuron's spike count which maximize decoding performance at each point in time. In both  
 113 models, the weights learned for each neuron are representative of synaptic connection  
 114 strength, but we use them here as a proxy for how important that neuron is to making each  
 115 perceptual decision. More broadly, these models allow us to examine how the importance of  
 116 a neuron varies depending on its response properties, the time since stimulus onset, and  
 117 which decision is being made.

### 118 Decoding weights generalize well, but not perfectly, over time

119 To see how variable the neural code is over the 500 ms stimulus duration, we can repeat  
 120 training and decoding at every time point and measure how weights generalize from one  
 121 time point to another. The generalization matrix for the 12-AFC decoder (Figure 2A) shows  
 122 decoding performance for every pairing of training and test times, for spikes counted in

123 sliding 50 ms time windows. In this case, decoding performance peaks at around 40%  
124 correct (chance is 8.3%). Note that we are primarily interested in how changing aspects of  
125 the decoder affects relative decoding performance, rather than trying to maximize absolute  
126 performance. Along the diagonal (solid box), weights are trained and tested on matching  
127 time points. The horizontal boxes show how weights from training early (dotted) and late  
128 (dashed) within a trial after motion onset generalize to all other decoding times.

129 We resampled our sub-populations in this and subsequent analyses because a neuron's  
130 weight depends on what information is available from other neurons. We could not assume  
131 that the sub-population of 136 neurons we recorded is an accurate reflection of the  
132 population that contributes to each readout in the whole animal. We thus resampled smaller  
133 sub-populations in order to estimate the sample-related variability in performance and  
134 weight.

135 In both the 12- and two-alternative identification decisions (Figure 2B & C), the performance  
136 of the decoders that were trained only at one time depends on the time during which they  
137 were trained. Training early (dotted line, 200 ms) only performs as well as the decoder  
138 trained at every time point in the earliest part of the response. Training late (dashed line, 400  
139 ms) performs as well as the decoder optimised at every time point through both the mid and  
140 late parts of the response. In both cases, training only once leads to below-chance  
141 performance following stimulus offset (Figure 2 B&C, dashed lines, 550 ms onward). This  
142 reflects transient adaptation effects that only the temporally-matched decoder can take  
143 advantage of (10,13,14).

144 These results show at least three distinct epochs in decoding performance: an early,  
145 contrast driven code (50-250 ms), a late sustained code (250-550 ms), and an adaptation-  
146 driven code (550 ms onward). The effects of adaptation following stimulus offset mean that  
147 models trained only once produce systematic errors that are consistent with perceptual  
148 aftereffects. Because we have evidence in the form of aftereffects that these coding errors  
149 affect perception, it is unlikely that the brain benefits from decoding weights that are

150 optimized at each time point after stimulus onset. This implies that whatever weights the  
151 brain uses, they will not be optimized at all time points, so the weaker decoding performance  
152 when the model fails to generalize perfectly may represent a good estimate of how much  
153 error the brain tolerates in a given perceptual code.

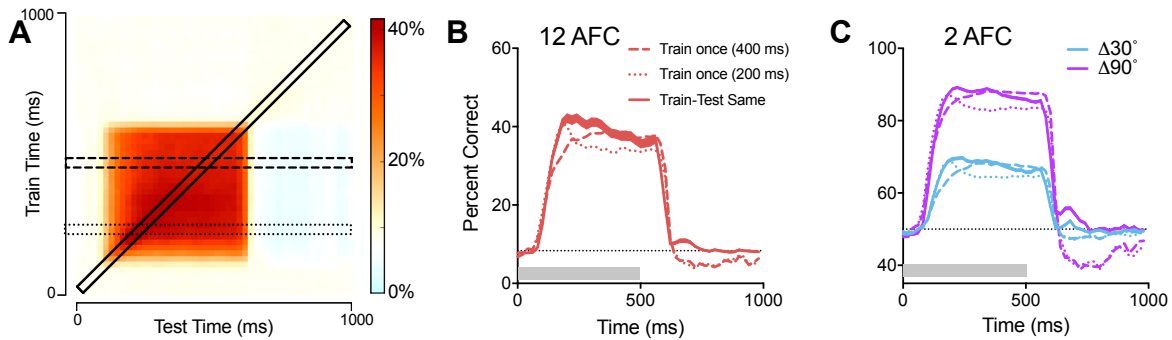

154

155 **Figure 2: Decoding weights generalize well, but not perfectly, over time. (A)** Full  
156 generalization matrix for 12-alternative decoding (chance = 8.3%). Percent correct is  
157 indicated by color for each combination of training and testing time. **(B)** Twelve-alternative  
158 decoding performance for three slices of the generalization matrix: train-test same (solid  
159 line), train 200 ms (dotted line), train 400 ms (dashed line). **(C)** as in B for fine and coarse  
160 two-alternative discrimination (chance = 50%).

161 Population size affects decoding performance, not weight structure  
162 Decoding performance as a measure of encoded information depends on many factors,  
163 including the size of the spike-counting window for each time point (the integration window),  
164 and the size of the neural population ( $n$ ) from which responses are integrated. These factors  
165 affect the structure of the recovered decoding weights, because when decoding is easy  
166 enough that performance is at ceiling, weights cannot be further optimized. In other words,  
167 the weighting that allows a population to solve an easy task perfectly may not extract  
168 enough information from the population to solve a more difficult task, even if the information  
169 is there. To circumvent this, we varied the integration window in order to match different  
170 population sizes for decoding performance, so that the weights could be examined without  
171 the number of neurons contributing to the population confounding our results. For simplicity,  
172 we examined the weights learned at a representative time point (200 ms) after stimulus  
173 onset.



174 To measure the effect of population size on how the weights were assigned to different  
175 neurons, we first calculated decoding performance for integration windows ranging from the  
176 prohibitively small to slightly longer than the duration of the stimulus (4-512 ms), and for sub-  
177 populations of 20, 40 or 130 neurons (Figure 3A-C). We fit cumulative Gaussian functions to  
178 the decoding performance, and interpolated to find an integration window that produced a  
179 level of performance well above chance (lower dashed lines), but below the saturation points  
180 of any of the functions. This corresponded to 60% correct for the 12-alternative decoder and  
181 80% for the two-alternative decoders (upper dashed lines).

182 We compared the weight profiles obtained for the different population sizes (Figure 3D-F).  
183 Each data point is the average weight for a neuron across 100 resampled sub-populations.  
184 Furthermore, as we tested twelve directions, each neuron contributes twelve weights per  
185 sub-population, either simultaneously in the 12-alternative condition, or individually for each  
186 direction-pairing in the two-alternative condition. Here, for clarity, we show all the weights  
187 (dots) for the  $n = 40$  population, and rolling averages for the larger and smaller populations.  
188 For all population sizes, the weights are distributed across preferred directions in the same  
189 way. In all cases there are relatively few extreme weights, with most weights close to zero.  
190 Notably, the weight profiles follow the same shape for the fine and coarse discrimination,  
191 unlike previous observations in primate V1 (1). Our simulations (below) suggest that this is  
192 because of the broader tuning curves in area MT.

193 To examine the stability of a neuron's weight in the context of different population sizes, we  
194 correlated the weights learned for a neuron in the full population against the weights it  
195 received in the 20 and 40-neuron sized subpopulations (Figure 3G-I). For all three decoder  
196 types, there is a strong positive correlation between decoding weights, but the regression  
197 lines for the subpopulations have slopes lower than 1, with scatter most likely to occur in the  
198 bottom left and top right quadrants. This means that while a neuron's precise weight may  
199 vary, that variation is restricted so that it almost never changes sign. This is reasonable,

200 because a given neuron may contribute more or less to a prediction, but it is unlikely to  
 201 switch from providing evidence for a stimulus condition to providing evidence against it.  
 202 These results show that, the principles that govern weighting are consistent across  
 203 variations in population size when populations are matched for decision difficulty.

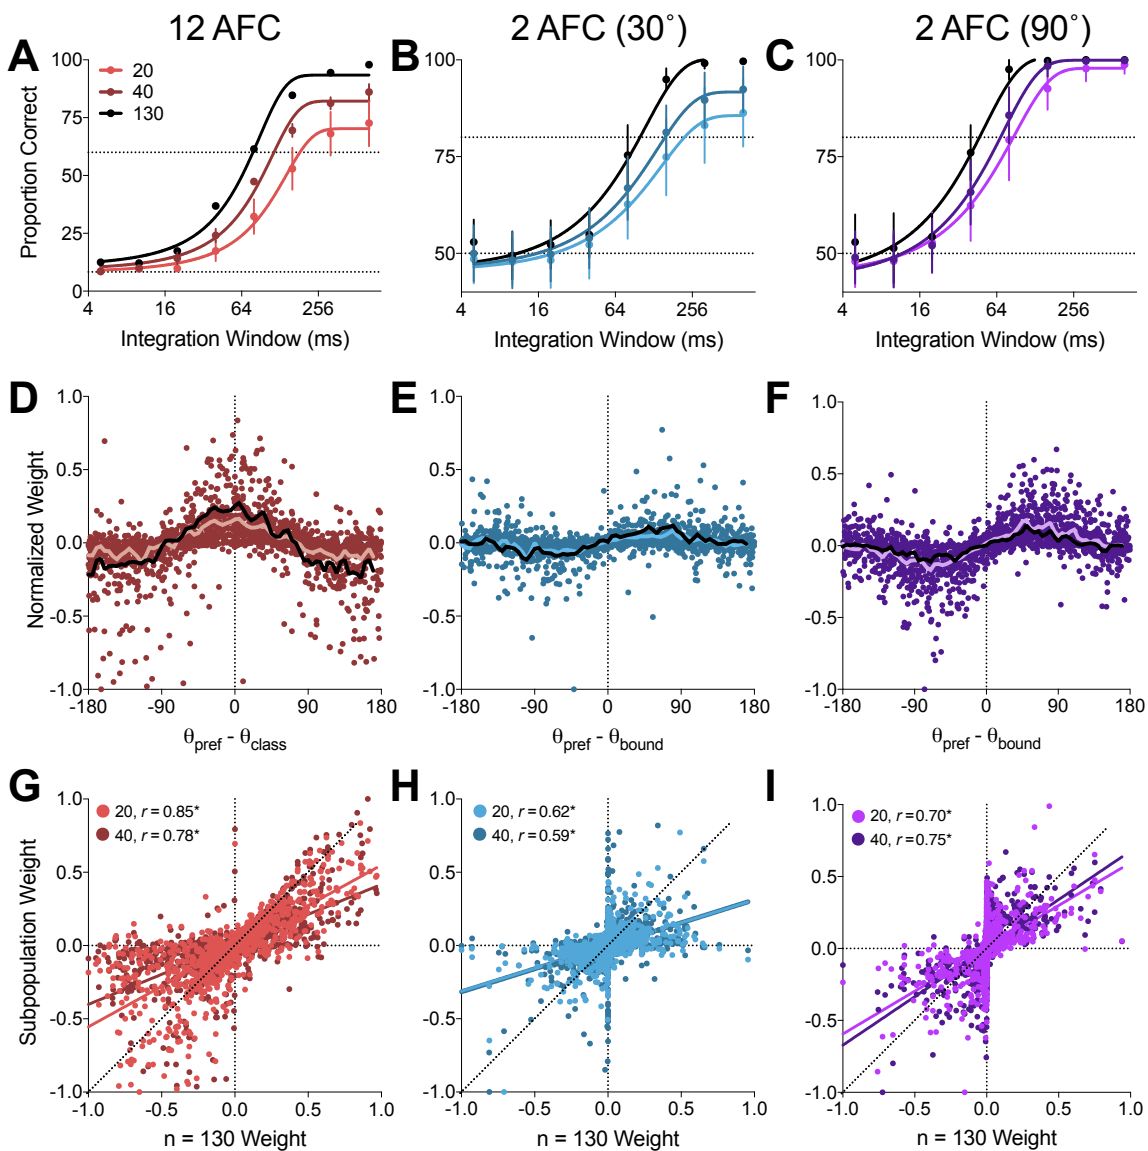

204

205 **Figure 3: Role of population size in decoding performance and optimal weights. (A)**  
 206 **Psychometric functions for a 12 AFC identification decoder for three different population**  
 207 **sizes (20, 40, and 130 neurons). Decision difficulty was parameterized by changing the size**  
 208 **of the integration window for spike counting. Percent correct data were fit with a cumulative**  
 209 **Gaussian function. The upper dashed line indicates the 60% threshold that we used to**  
 210 **choose an integration window that would match the performance across population sizes.**  
 211 **(B) As in A for a coarse discrimination (90°). Here and in C, we used a cutoff of 80% correct**  
 212 **to determine a spike counting window. (C) As in B, for a fine 2 AFC discrimination (30°).**  
 213 **Weights for each neuron depended on the separation between their preferred direction and**

214 the stimulus class. Decoding was performed at the threshold spike counting window  
215 determined in A. (E) As in D, for coarse 2 AFC discrimination relative to the discrimination  
216 boundary. (F) As in E, for fine 2 AFC discrimination. (G-I) Correlation between weights for  
217 each neuron across population sizes. Weights are strongly correlated, with a tendency for  
218 weaker (closer to zero) weights in the smaller populations. Lines are regression lines for the  
219 two subpopulation sizes. Asterisks indicate  $p < 0.01$ .

## 220 Decoding weight is related to the response properties of the neuron

221 We and others have shown that decoding neural populations requires setting weights that  
222 depend on the relationship between the neuron's preferred direction and the task. However,  
223 in populations that vary in a range of response properties (such as selectivity, firing rate,  
224 trial-to-trial variability, or spontaneous rate), the weights learned across the population are  
225 still difficult to predict based on preferred direction alone. To account for some of this  
226 variability, we explored how the weights correlated with the response properties of the  
227 neurons, specifically for conditions in which the preferred direction of the neuron predicted  
228 that its weight should be at its highest. For example, in a twelve-alternative decision, this  
229 means when its preferred direction is within 15 degrees of the presented class.

230 The weights have a nonlinear relationship with the preferred direction of the neuron (Figure  
231 3D-F). To account for this, we further examined weights only when the preferred direction  
232 predicted that they should be most informative (colored weights, Figure 4A). In 100  
233 subpopulations of 20 neurons, we measured the partial Spearman's correlation between the  
234 weights and each of selectivity, gain, Fano factor, and bandwidth. The direction selectivity  
235 (Figure 4B), and, to a lesser extent, the gain (Figure 4C) of each neuron correlates positively  
236 with the weight it is assigned across all types of decoding decisions. Fano factor (Figure 4D)  
237 correlates negatively with weight. Low variability, as measured by a low Fano factor,  
238 appears to be necessary but not sufficient: all of those neurons with large weights have low  
239 Fano factors, but many neurons with low Fano factors are not weighted strongly. Bandwidth  
240 of the direction tuning curve (Figure 4E) does not appear to correlate systematically with  
241 weight, which suggests that the correlation between selectivity and bandwidth ( $r_s = 0.24$ ,  $p <$   
242  $0.01$ ) contributes to the strong appearance of a relationship between bandwidth and weight.  
243 These results are consistent across population sizes (Supplementary Table 1).

244 These results suggest that the best predictor of a neuron's decoding weight, after preferred  
245 direction, is its selectivity. Fano factor, gain, and bandwidth appear to have progressively  
246 weaker and less systematic correlations with decoding weight.

247

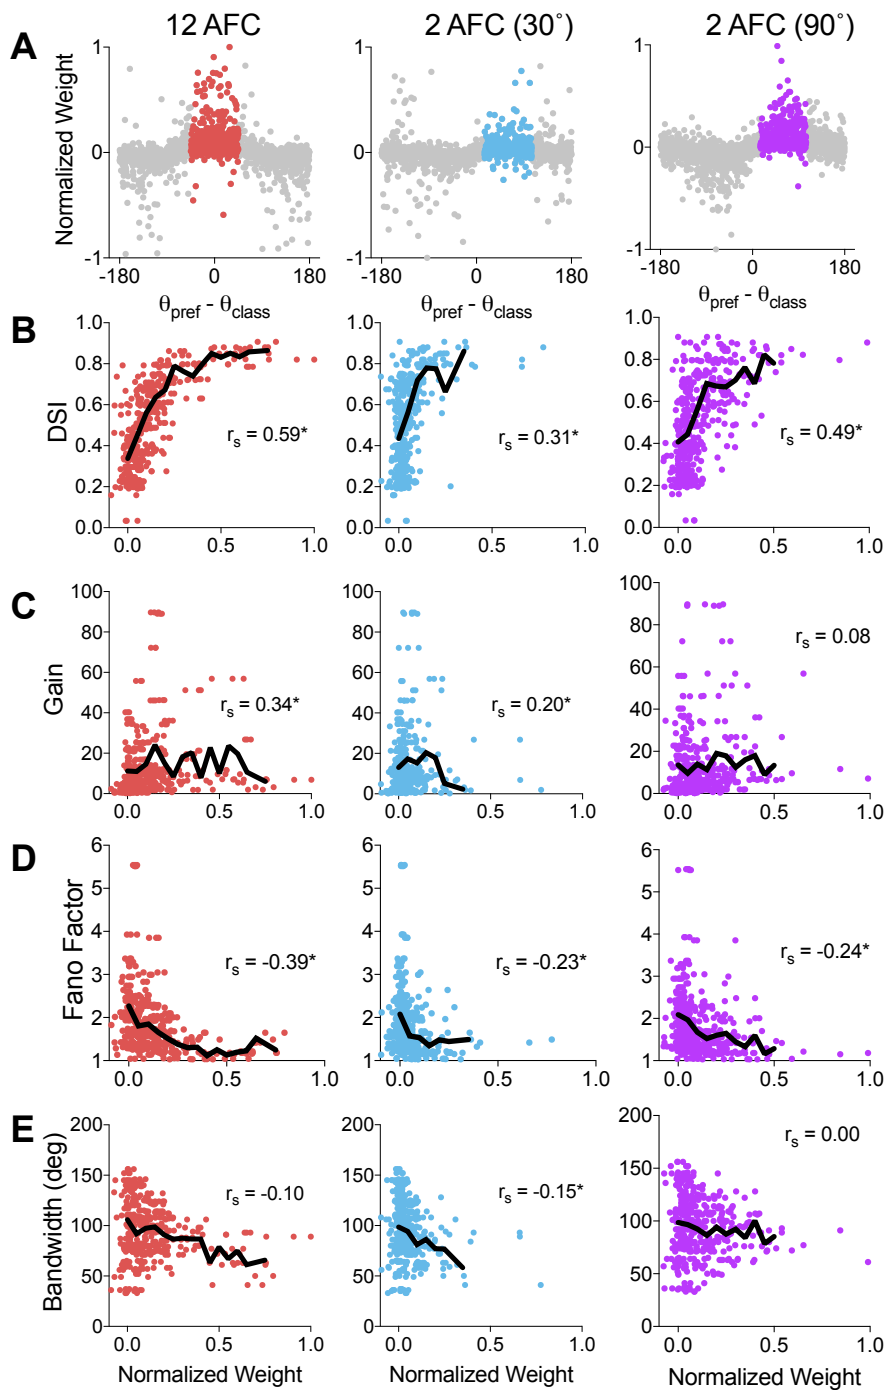

248

249 **Figure 4: Direction selectivity and Fano factor predict decoding weight. (A) Left:**  
250 **Weights assigned to neurons in 100 subpopulations trained to perform 12-alternative**

251 identification, plotted against the different between each unit's preferred direction and the  
252 class of the weight. We further analyzed weights for those classes within the range of +/- 45°  
253 of each unit's preferred direction (colored points). Middle, Right: As in A, for two-alternative,  
254 90° and 30° discriminations. The weights we went on to analyze were those assigned when  
255 the preferred direction of the neuron was between 10° and 110° from the discrimination  
256 boundary. Black lines show running means. **(B)** Direction selectivity index against the weight  
257 of each neuron for an identification decision. For clarity, only weights greater than 0 are  
258 shown, but negative weights were still included in correlation analyses. Inset *r*-value is the  
259 Spearman partial correlation between direction selectivity and weight (discounting variance  
260 shared with gain, Fano factor, and bandwidth), asterisks indicate  $p < 0.01$ . **(C-E)** As in B, for  
261 gain, Fano factor, and bandwidth.

## 262 Weights assigned by optimal decoders are scaled by selectivity

263 We aim to describe general encoding principles, but we have recorded from a limited  
264 population of cells. Therefore, we generated homogeneous synthetic neural populations that  
265 allowed us to define a weighting function that describes the relationship between the  
266 decision and the preferred direction. Then, to sample a wider variety of populations and fit a  
267 model based on physiological properties, we simulated unique heterogeneous populations of  
268 neurons that conformed to the distributions of tuning properties we observed in our  
269 recordings. In the following sections we:

- 270 1) **Define generative models** that can ascribe weights to simulated neurons in  
271 homogeneous populations based on preferred direction alone.
- 272 2) **Extend the generative models** to heterogeneous populations by fitting them to subsets  
273 of simulated neurons grouped by their Fano factor and direction selectivity.
- 274 3) **Define an *a priori* decoding model** that gives a generative model for neurons based on  
275 their preferred direction, direction selectivity and Fano factor.
- 276 4) **Compare the *a priori* decoding performance** to performance achieved by models  
277 defined through machine learning in heterogeneous populations of recorded neurons.

278 By using two layers of models, were able to dissect which of a neuron's tuning properties are  
279 generically important for decoding accuracy, regardless of the instantaneous responses of  
280 each neuron.

## 281 Defining generative models by simulating and decoding a homogenous 282 population

283 As shown in this paper and previously, for a given relationship between the preferred  
284 direction and the class or decision boundary, weights in heterogeneous populations are  
285 variable (e.g. Figure 4A). This variability precludes us from fitting a model that describes the  
286 relationship between the preferred direction of the neuron, the class or decision boundary,

287 and the weight the neuron is assigned in a decoder. To overcome this, we first simulated a  
 288 homogeneous population.  
 289 The properties of the recorded population (Figure 5A-D) were first characterized using  
 290 inverse Gaussian distributions (Fano factor and gain), an exponential function (spontaneous  
 291 rates) and a Gaussian distribution (bandwidths). To simulate a homogeneous population, the  
 292 tuning properties were fixed to the means of the distributions in Figure 5A-D, and preferred  
 293 directions were sampled randomly from a uniform distribution.

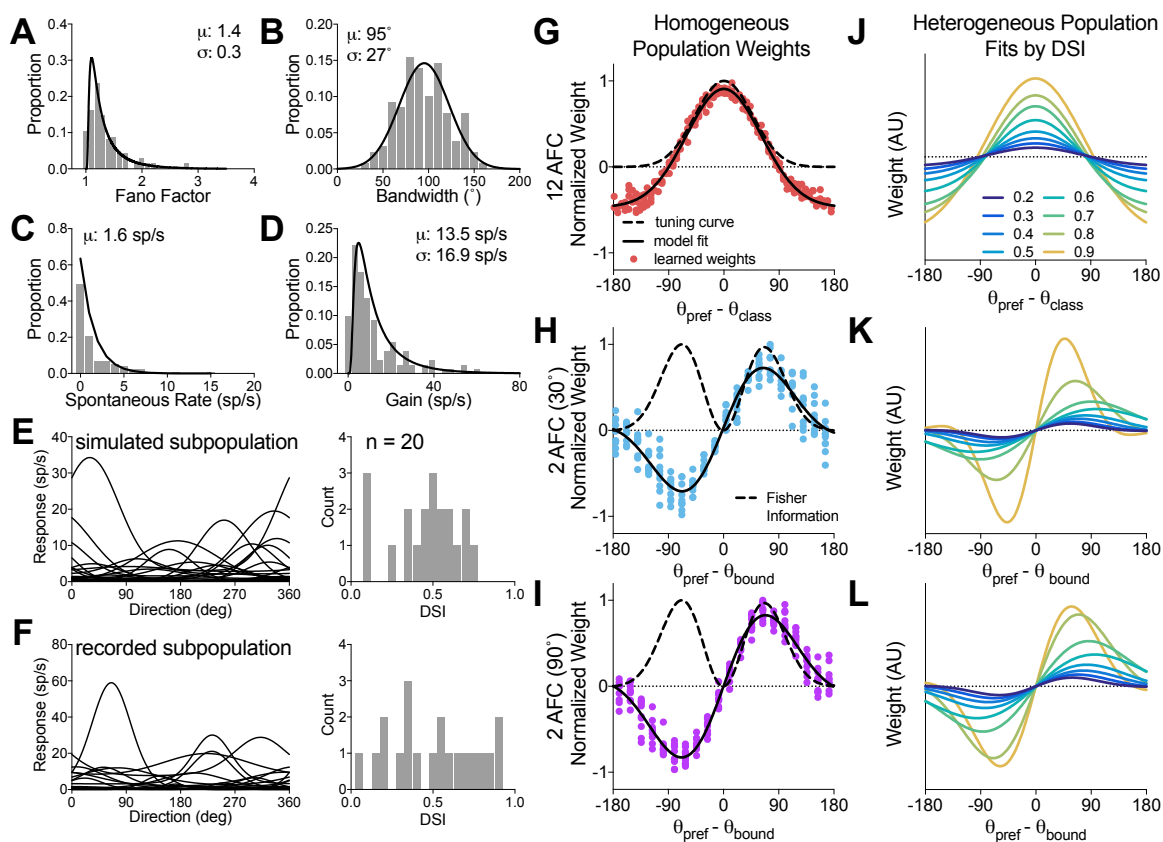

294

295 **Figure 5: In simulated populations the distribution of weights is also predicted by**  
 296 **selectivity.** (A) Distribution of the Fano factor for 136 recorded neurons (bars), and the  
 297 inverse Gaussian probability density function (PDF) used to generate simulated populations  
 298 (line). The mean and standard deviation for the simulated populations are matched to the  
 299 recorded population. (B) As in A for bandwidth, and a Gaussian PDF. (C) As in A, for  
 300 spontaneous rate and an exponential PDF. (D) as in A for gain and an inverse Gaussian  
 301 PDF. (E) example of tuning curves generated by the model for a population of 20 neurons,  
 302 and the distribution of their measured DSIs. (F) A subpopulation of 20 recorded neurons and  
 303 their DSIs for comparison. (G) Weights learned in a simulated homogeneous population with  
 304 the same mean spontaneous rate, gain, and bandwidth as in the recorded population. The  
 305 grey dots are the learned weights for each neuron, in each class, for each of 5 randomly  
 306 generated populations. Plotted with these weights is the Gaussian model fit to the data (solid

307 line), and the shape of the tuning curve centered at 0 (dashed line). **(H)** As in G, for a fine  
308 two-alternative discrimination. The solid line shows the Gabor model fit to the data, and the  
309 dashed line shows the Fisher information. **(I)** As in H for a coarse two-alternative  
310 discrimination. **(J)** Model fits to weights binned by DSI and Fano factor, bins are non-  
311 overlapping 0.1 units wide, and begin at the DSI indicated in the legend. Only the Fano  
312 factor bin 1.25-1.5 is shown. See Supplementary Figure 1 for summary of  $R^2$ . **(K&L)** As in J  
313 for fine and coarse two-alternative discrimination.

314 To fit models that can account for the relationship between preferred direction and weight in  
315 a homogeneous population, we used the same machine learning approach to weight the  
316 simulated neurons for decoding. The weights that the decoders learned for neurons in these  
317 populations (Figure 5G-I, circles) were very similar to what would be expected given the  
318 tuning curve (dashed line, Figure 5G), or the Fisher information (Figure 5H, I). There is some  
319 variability in the weights, even in homogeneous populations, caused by Poisson spiking  
320 variability over the limited number of trials used to train each decoder. We defined two  
321 generative models based on the homogeneous simulation weights that capture the expected  
322 weight given the preferred direction of the neuron: a Gaussian model (Equation 1) for the  
323 twelve-alternative condition, and a Gabor model (Equation 2) for the two-alternative  
324 conditions (Figure 5G-I, black lines) (see Methods). Both models have two free parameters:  
325 amplitude and spread.

### 326 **Extending the generative models by simulating and decoding a heterogeneous** 327 **population**

328 Using a homogeneous population allowed us to define models that account for the role of  
329 preferred direction in decoding. We expected that the shape of those models (amplitude and  
330 spread) would vary for neurons that tended to have higher weights. To fit the amplitude and  
331 spread parameters used to predict a neuron's decoding weight, we simulated 150  
332 heterogeneous populations of 20 neurons each (e.g. Figure 5E) with the same population-  
333 wide distributions of properties (Figure 5F). Neurons were created with preferred directions  
334 sampled randomly from a uniform distribution, and other properties drawn independently  
335 from the relevant distribution. An exemplar heterogeneous population shows how the  
336 simulated neurons (Figure 5E) closely resembled those we recorded (Figure 5F) – including  
337 the wide range of observed selectivities – even though selectivity was never set explicitly.

338 We learned decoding weights for each neuron then partitioned the weights for the 3000  
339 simulated neurons into evenly spaced bins based on their selectivity (8 bins) and Fano factor  
340 (9 bins), and fit the generative models to the weights in each bin. Figure 5 J-L illustrates how  
341 these models vary with selectivity, for a single Fano factor bin (1.25-1.5). This approach  
342 allows us to examine how neuronal weights are best allocated to neurons with specific  
343 selectivities and spiking variability. Supplementary Figure 1 shows the model parameters  
344 (amplitude and spread) and goodness of fit for all subsets of neurons. Not all combinations  
345 of Fano Factor and selectivity matched neurons in the simulation, so we fit a total of 51  
346 models in the 12-alternative decision, and 38 models in the two-alternative decisions.

### 347 **Defining the *a priori* model**

348 In the Gaussian model used to describe the optimal weights for a 12-alternative decision, we  
349 found that the amplitude of the model is higher for more direction-selective neurons with  
350 lower Fano factors (Figure 5J, Supplementary Figure 1A, top). Given how well the two-  
351 parameter generative models describe neuronal weightings for bins of neurons with similar  
352 selectivity and Fano factor, we then tried to predict the amplitude and spread parameters of  
353 the weighting functions for any arbitrary neuron, given only its DSI and Fano factor. The  
354 amplitude parameter was well defined by a second-order polynomial regression surface ( $R^2$   
355 = 0.97), however, the relationship between the Gaussian model's spread, Fano factor and  
356 selectivity is more complicated (Supplementary Figure 1B, top). It appears as though the  
357 spread is narrowest for selective neurons with higher Fano factors, but the data are noisy  
358 and the range is small (64°-80°), so for further analysis we fixed this parameter at the  
359 median: 72°.

360 Likewise, in the Gabor model used to account for weights in the 30 and 90 degree  
361 discriminations, we were able to capture the relationship between model amplitude, Fano  
362 factor, and selectivity with a second-order polynomial ( $R^2_{90} = 0.94$ ,  $R^2_{30} = 0.93$ ), but the  
363 surface that described the model spread was too complex to fit with a reasonable number of  
364 parameters. In these cases the ranges were large, but not systematic, and many of the most



365 extreme values were associated with lower  $R^2$ . For further analyses, we used a spread with  
366 the median value:  $98^\circ$  in the 30 degree discrimination and  $107^\circ$  in 90 degree discrimination.

367 These results show that larger weights are learned for more selective, less variable neurons,  
368 and outline quantitatively what weight is expected for a given preferred direction, selectivity  
369 and Fano factor. This quantitative description allowed us to set weights for our recorded  
370 population of neurons based on these properties alone instead of using a supervised  
371 learning algorithm.

### 372 **Comparing *a priori* decoding performance**

373 We have shown that weights learned to decode real and simulated populations depend  
374 systematically on direction selectivity, but this does not mean that these weights directly  
375 improves decoding performance – those neurons with high weights may instead facilitate  
376 learning. To address the direct impact of weights on performance, we extended the  
377 generative Gabor and Gaussian models described above to define weights *a priori* and  
378 compared the decoding performance of several different *a priori* decoding models to  
379 decoders trained at each time point. In brief, the learned weights produce the best decoding  
380 for the given set of neurons, and defining weights based on the preferred direction alone  
381 (PD-only) gives the worst performance. We can compare how other *a priori* models including  
382 selectivity (DSI) and Fano factor (FF) perform within this range to give insight into which  
383 neuronal properties affect decoding.

384 We trained decoders on the responses of 100 subpopulations of 20 neurons each, sampled  
385 with replacement from the 136 neurons we recorded from marmoset MT. For each  
386 subpopulation, we compared performance with the learned weights (Figure 6A) to  
387 performance with weights set according to four different models. The preferred direction only  
388 (PD-only) model (Figure 6B) is the model typically considered in population decoding.  
389 Regardless of any other properties, neurons are weighted based on the relationship  
390 between their preferred direction and the class being decoded.

391 To determine the potential benefit of accounting for additional response properties, we  
 392 modified the weighting function for each neuron based on the fits regression surface. We  
 393 added selectivity to this model by setting the amplitude of the Gaussian based on where the  
 394 measured selectivity of the neuron fell on the regression surface with Fano factor = 1.5  
 395 (Figure 6C), and added Fano factor in the same manner with selectivity = 0.8 (Figure 6D).  
 396 High values of Fano factor and selectivity were chosen so that they did not handicap the  
 397 cell's potential influence. Precise values did not matter – we tested several variants of fixed  
 398 values and the results were unchanged. Finally, we included a model that accounts for  
 399 selectivity, Fano factor, and the interaction between them (Figure 6E).

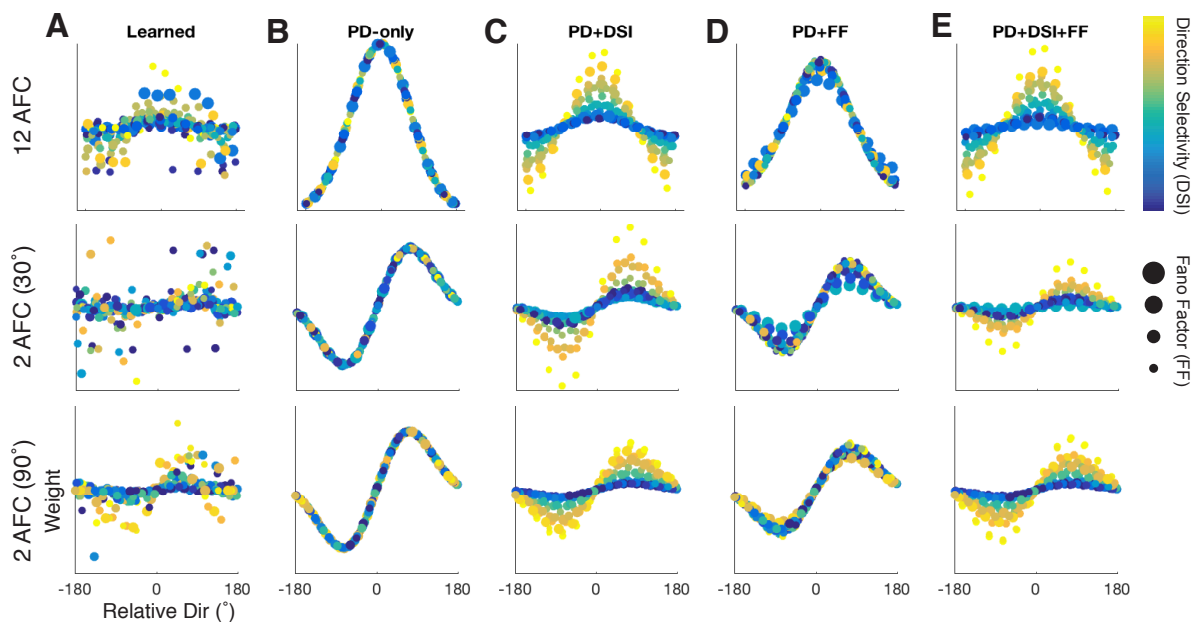

400  
 401 **Figure 6: Weight models based on machine learning and fits to simulated weights. (A)**  
 402 **Five models of weights used to identify stimulus direction in a 12-alternative decision. From**  
 403 **left, the learned weights model uses those learned for each subpopulation of 20 neurons**  
 404 **(one example population is depicted here). The preferred direction (PD-only) model weights**  
 405 **each neuron based on its preferred direction. The PD+DSI and PD+FF models are scaled**  
 406 **based on each property alone, and the PD+DSI+FF model scales weights based on all three**  
 407 **properties. (B) As in A, for a fine (30°) two-alternative discrimination. (C) As in A, for a**  
 408 **coarse (90°) discrimination. Color scale shows direction selectivity index (DSI).**

409 We used these weighting functions to decode the stimulus direction as before, and  
 410 compared the average performance of each of the *a priori* models to the model with learned  
 411 weights at all time points (Figure 7A-C), and then specifically compared the distributions of  
 412 performances at a single time point (400 ms) (Figure 7D-F). We found that the *a priori* model

413 performance was indistinguishable from the learned model performance in the coarse (90°)  
 414 two-alternative discrimination for two models: PD+DSI (Figure 7F, dotted) and PD+DSI+FF  
 415 (Figure 7F, solid purple) (Wilcoxon Signed Rank Test,  $p > 0.01$ ,  $n = 1200$ ). The Learned  
 416 model significantly outperformed all other models (Wilcoxon Signed Rank Test,  $p < 0.01$ ).

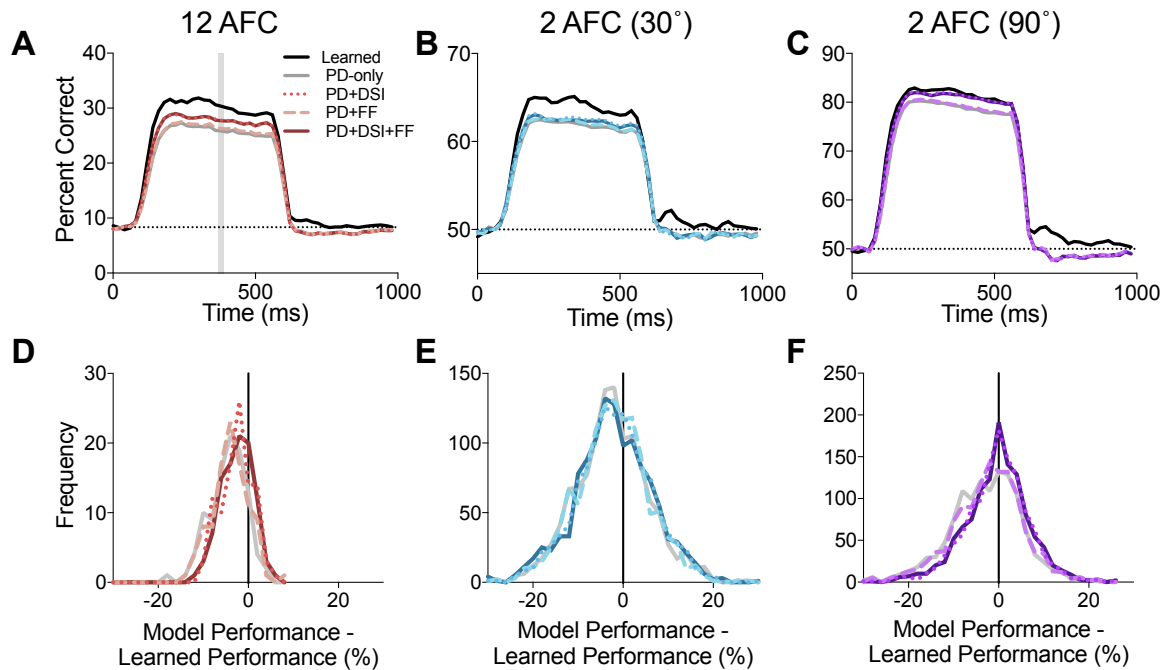

417 **Figure 7: Weight models that account for preferred direction and selectivity account**  
 418 **for much of learned decoding performance. (A)** The performance of the models in Figure  
 419 **6** over time. The learned weights outperform the modelled weights, but the models including  
 420 **selectivity and variability perform at least as well as the model that accounts for preferred**  
 421 **direction alone. (B)** As in A for a fine two-alternative discrimination. **(C)** As in A for a coarse  
 422 **two-alternative discrimination (D)** Comparison between models and learned weights for each  
 423 **of the 100 subpopulations examined 400 ms after stimulus onset (shaded region in A). The**  
 424 **learned performance is subtracted from the model performance so negative values are**  
 425 **subpopulations where the model was worse than the learned weights, and positive values**  
 426 **indicate that the model was better than the learned weights. (E)** As in D for a fine two-  
 427 **alternative discrimination. Note that the high number of samples compared to D is because**  
 428 **each subpopulation was decoded multiple times: once for each pair of directions. Thus,**  
 429 **there are 1200 instead of 100 samples. (F)** As in E for a coarse two-alternative  
 430 **discrimination.**  
 431

432 Amongst the four *a priori* models, there was a significant main effect of model on decoding  
 433 performance (Friedman test,  $p < 0.01$ ). Including Fano factor alone (PD+FF, Figure 7,  
 434 dashed) significantly improved performance above PD-only in only the coarse two-  
 435 alternative discrimination (Dunn's multiple comparisons,  $p > 0.01$ ). On the other hand,  
 436 including selectivity alone (PD+DSI, Figure 7, dotted), or with variability (PD+DSI+FF, Figure  
 437 7, solid color) consistently improved decoding performance for all types of discrimination ( $p <$

438 0.01). We found no evidence that including variability along with selectivity (PD+DSI+FF)  
439 could improve performance over selectivity alone (PD+DSI) ( $p > 0.01$ ).

440 These results show that accounting for direction selectivity improves the representation of  
441 motion in a population code beyond what is attainable by accounting for preferred direction  
442 alone. Furthermore they show that while neurons with a low Fano factor and high direction  
443 selectivity are likely to be weighted strongly by machine learning techniques, incorporating  
444 the influence of Fano factor on weight does not measurably improve performance in most  
445 cases, while accounting for the influence of selectivity on weight does. This may be because  
446 selectivity has a stronger relationship with the optimal weight, or it may be because a low  
447 Fano factor is useful in adjusting weights during learning, but negligible once the optimal  
448 weightings are already known. Because different schemes perform similarly, they also  
449 suggest that the brain has a high tolerance for sub-optimal weighting in even small  
450 populations, particularly in the case of easier perceptual discriminations.

## 451 Discussion

452 Decoding is one way to assess the amount of information contained in the firing rates of a  
453 population of neurons. In its most basic form, decoding applies weights to neurons in a  
454 population vector scheme that depends only on each neuron's tuning preference (2,4). At its  
455 most flexible, decoding uses machine learning to derive the weights for each neuron that  
456 give the best estimates of the stimulus (1,9). This has the advantage of being completely  
457 agnostic about which neurons are most informative, and does not require knowing anything  
458 about each neuron in advance. Here, we have combined these techniques to show that  
459 neurons are not equally informative members of the population. We found that those  
460 neurons that are more selective should be weighted more heavily in order to improve the  
461 population representation of the stimulus.

462 Although a machine learning approach to assessing population coding is advantageous  
463 overall, it does have limitations. When we use a neuron's learned weight as a proxy for how

464 informative it is, we are confounding its contributions to learning and its contributions to the  
465 ultimate discrimination. Our *a priori* modeling only partially addresses this confound,  
466 because the absence of a statistically significant effect (i.e. for Fano factor) does not mean  
467 that no effect exists. Further, applying weights multiplicatively means that neurons with very  
468 low firing rates may be weighted strongly because those weights are then multiplied by  
469 values close to zero. Machine learning approaches are also limited by the need for a large  
470 number of trials to train the decoder before it may be tested on held-back trials. Techniques  
471 such as leave-one-out testing (15) help to make the most of the available trials while still  
472 performing cross-validation, but there is no substitute for larger, more varied training and  
473 testing data sets. In particular, while leave-one-out validation approaches cross-validate  
474 each test trial, they are not able to assess the variability that comes from changing the  
475 training corpus. We were able to measure the variability to an extent by resampling both the  
476 subpopulations of neurons and how trials were distributed in an 80-20 training-testing cross-  
477 validation regime, but this approach is still limited by the total number of available trials.

478 Knowing that with a mismatch between the weighting scheme and a population biased by  
479 adaptation we can predict observed perceptual aftereffects (Zavitz et al., 2016), it is unlikely  
480 that any weighting scheme varies on short timescales. That weights fail to generalize  
481 completely from one time to another implies that the perceptual readout is often sub-optimal,  
482 even setting aside adaptation-induced biases. However, our results suggest that there is  
483 likely some tolerance for sub-optimal weighting schemes. Using the *a priori* models we have  
484 assigned weights that were substantially different from those the models learned, and found  
485 that as long as they accounted for the preferred direction, the models could be used to  
486 discriminate and identify stimulus directions within a median performance drop of less than  
487 4% correct.

488 The easiest perceptual discrimination we tested (90° two-alternative) was also the least  
489 sensitive to the precise weights applied to each neuron. Performance in this discrimination  
490 dropped by a median of 2% correct with preferred-direction-only model, and was equal to

491 performance for the learned weights with any model including selectivity. This is interesting,  
492 because performance was not at ceiling with respect to the percent correct, but it may have  
493 been at ceiling given the information available in 50 ms of spiking information from 20  
494 neurons. This can happen if a proportion of trials are ‘unsolvable’, either by being entirely  
495 ambiguous, or by having firing rates that, on most other trials, represent a different stimulus.  
496 Despite their temporal rigidity, neurons are dynamically re-weighted for different perceptual  
497 tasks in both dramatic (identification vs. discrimination), and subtle (fine vs. coarse  
498 discrimination) ways. This suggests that the relatively flexible readout scheme evident  
499 across perceptual tasks is the result of top-down influences switching between stereotyped  
500 weighting functions, or refining a weighting scheme over much longer timescales than  
501 investigated here. Similarly, perceptual learning can correct for biases in the population  
502 code, so it is likely that over longer time scales errors like those we see in adaptation-related  
503 aftereffects are ultimately corrected.

504 Previous studies have reported that the pattern of weights learned in fine discrimination  
505 tasks is steeper in the vicinity of the category boundary, which corresponds to a narrower  
506 spread in our model (1). However, these findings were reported for orientation discrimination  
507 with primate V1 neurons, which have a much narrower bandwidth than neurons in MT. A  
508 model that rapidly changes from negative to positive weights near the discrimination  
509 boundary can take advantage of neurons with narrow tuning, but such cells were a minority  
510 in our recorded, and therefore our simulated, populations. Still, there is some evidence that  
511 in our fine discrimination task the most selective cells had weights described by a narrower  
512 model (Figure 5K, Supplementary Figure 1B), and that cells with lower bandwidths tended to  
513 be weighted more heavily ( $r = -0.15$ ,  $p < 0.01$ ).

514 Fisher information determined for a single neuron’s tuning curve predicts decoding weights  
515 in two-alternative discrimination tasks for homogeneous populations, and this function can  
516 be extended to describe decoding weights in heterogeneous populations. The relationship  
517 between the Fisher information and the weights depends on the relationship between each

518 neuron and the discrimination boundary of the task. For example, when discriminating  $0^\circ$  vs  
519  $90^\circ$ , the boundary is  $45^\circ$ . In an identification task there is no single discrimination boundary.  
520 The same can be said for very coarse (i.e.  $180^\circ$ ) discriminations: when the tuning curves  
521 don't overlap, there are many, equally valid, discrimination boundaries. In these cases it is  
522 less informative to know the Fisher information of a single neuron or the population.  
523 We examined only how our neurons might contribute to direction perception, but it is likely  
524 that the same neurons contribute to multiple population codes. In MT alone, it is likely that  
525 the population simultaneously represents motion direction, speed (16–18), eye position (19),  
526 and disparity (20,21). How each neuron's selectivity interacts with the population to code  
527 multiple stimulus properties simultaneously is an open question.

## 528 Conclusions

529 In this work, we found that direction selectivity and Fano factor predicted the weight  
530 assigned to a neuron with a given preferred direction. In some ways, this is not surprising as  
531 neurons with high selectivity and low variability are also going to be the most useful to the  
532 sort of iterative, supervised learning algorithm commonly used to decode neural responses.  
533 We addressed this concern by using the generative models fit to the learned weights in  
534 simulated populations (Figure 5) to produce weights for the recorded neurons based on their  
535 preferred direction, Fano factor, and direction selectivity (Figure 6). These modeled weights  
536 underperform the learned weights but, importantly, models that include selectivity as a factor  
537 outperform models based on preferred direction alone. This suggests that while high  
538 selectivity may improve learning, it also improves a neuron's contribution to a population  
539 code.

## 540 Methods

### 541 Ethics Statement

542 Our electrophysiology experiments were conducted in accordance with the Australian Code  
543 of Practice for the Care and Use of Animals for Scientific Purposes. All procedures were  
544 approved by the Monash University Animal Ethics Experimentation Committee.

### 545 Electrophysiology

546 We performed extracellular recordings in four anesthetized, adult New World monkeys (3  
547 male, 1 female; common marmoset, *Callithrix jacchus*). Our procedures are slightly modified  
548 from the procedure in (22), as described by (23). Briefly, anesthesia was induced with  
549 alfaxalone (Alfaxan, 8 mg/kg), and a tracheotomy and vein cannulation were performed. The  
550 animal was artificially ventilated with a gaseous mixture of nitrous oxide and oxygen (7:3).  
551 Maintenance solution with opiate anesthetic (sufentanil) and paralytic (pancuronium  
552 bromide) was infused intravenously. Atropine and phenylephrine hydrochloride eye drops  
553 were applied; then the cornea was protected, and the eyes were fitted with contact lenses to  
554 bring a monitor at 350 mm into focus. The ipsilateral eye was occluded. A craniotomy and  
555 durotomy were performed over area MT, and a 10x10, 96 channel, "Utah" array (Blackrock  
556 Microsystems) was implanted using a pneumatic insertion tool over area MT (localized using  
557 gross anatomical landmarks, verified postmortem using receptive field maps and histology).  
558 Recordings were collected at 30 kHz using a Cerebus system (Blackrock Microsystems).  
559 The raw voltage signal was high pass filtered at 750 Hz, and spikes were detected based on  
560 threshold crossings. Spikes were manually segregated offline into isolated single units using  
561 custom MATLAB software. Responses from each single unit were trial shuffled, and units  
562 were combined across animals. Non-selective units (direction selectivity index < 0.2 in all 50  
563 ms spike bins) were excluded from further analysis. A total of 136 direction selective single  
564 units from four animals were used throughout the study.

### 565 Visual Stimulation

566 Stimuli were presented on a VIEWPixx 3D (1920x1080 pixels; 520x295 mm; VPixx  
567 Technologies) positioned at a viewing distance of 350 mm. The stimulus filled the display



568 and consisted of a sheet of white dots on a black background. The field consisted of 0.5 dots  
569 per degree square, and each dot subtended 0.3 degrees of visual angle. Dots moved  
570 coherently with no noise in 1 of 12 directions and at 8, 10, or 20 cycles per degree. Data  
571 were collapsed across stimulus speeds. The stimulus moved in one direction for 500 ms and  
572 was followed by a blank (black) screen before another, random, direction was presented.  
573 Each direction was presented 120 times.

#### 574 Characterizing neurons

575 We characterized our recorded neurons by their preferred direction, bandwidth, Fano factor,  
576 gain, and direction selectivity. A raw tuning curve was constructed based on the mean  
577 response to each stimulus direction. Gain was calculated as difference between the  
578 maximum and minimum responses. Preferred direction was calculated as the vector sum of  
579 the tuning curve, and direction selectivity as its vector magnitude. The bandwidth was  
580 computed based on the full width at half height of a Von Mises function fit to the tuning  
581 curve. Fano factor was calculated as the spike count variance divided by the mean across  
582 all directions.

#### 583 Decoding

584 The stimulus direction was decoded at multiple time points throughout the 500 ms duration  
585 based on spike counts measured in time windows of 4-512 ms. These spike counts were  
586 weighted, then integrated across neurons and nonlinearly transformed. In the discrimination  
587 model, the sum is compared to a criterion to determine which direction the model reports. In  
588 the identification model, each spike count is weighted multiple times – once for each of the  
589 possible stimulus directions. These weighted spike counts are integrated and transformed as  
590 before, then used to create a direction vector, which the model provides as a continuous  
591 estimate of the stimulus direction.

592 We used two logistic regression models to decode neuronal responses: a multinomial  
593 generalized linear model (GLM) to make identification decisions, and a binomial GLM to  
594 make discriminations. For optimization, we used the glmnet statistical software package in

595 Matlab (24,25). The models were trained on 80% of the stimulus trials by refining weights to  
596 optimize performance via penalized maximum likelihood. The performance we report is the  
597 decoding performance on the remaining 20% of trials. Which trials were training trials were  
598 randomly selected each time a decoder was trained. In different experiments we varied the  
599 sizes of the populations and the size of the spike integration window, but unless otherwise  
600 specified we used subpopulations of 20 neurons, and integrated spikes for 30 ms. We  
601 decoded at a temporal resolution of 10 ms.

602 To perform two-alternative discriminations on a data set collected for 12 stimulus directions,  
603 we selected out only the trials in each possible pairing. For example, in the coarse two-  
604 alternative discrimination, we trained models to decode  $0^\circ$  vs  $90^\circ$ ,  $30^\circ$  vs  $120^\circ$ , etc.. This  
605 means that the 12-alternative decoder has 12 times as many trials to train and test on, but  
606 that 12 times more decoders were trained for the two-alternative discriminations (i.e., 100  
607 subpopulations for each decoding task, times 12 different direction pairs). For this reason,  
608 the weights tend to be noisier in the two-alternative decoders, but their performance  
609 distributions are smoother. Note also that the 12-alternative decoder is training a weight for  
610 every class, while the two-alternative decoders train only one weight, so the ratio of  
611 parameters to training data is the same in all cases.

612 To create *a priori* decoding models, we used the same procedure, except instead of learning  
613 the optimal weights for each neuron and class, we applied the weights predicted by the  
614 relevant model.

615 In the Gaussian decoding model, for direction identification, the relevant weight is given by  
616 the difference between a neuron's preferred direction and the class of the weight ( $\theta_{\text{pref}} - \theta_{\text{class}}$ ).  
617 The Gaussian was centered at  $\theta_{\text{pref}} - \theta_{\text{class}} = 0$ , and had three free parameters: gain, standard  
618 deviation, and an additive shift. After fitting these parameters to the simulated data, we used  
619 selectivity as the gain parameter, and fixed the standard deviation and shift (1 and -1  
620 respectively), to decode our neuronal populations.

$$w(\theta) = (ae^{-\theta^2/2\sigma^2}) - a/2 \quad (1)$$

621

622 The twelve-alternative model was a Gaussian function centered at  $\theta_{\text{pref}} - \theta_{\text{class}} = 0$ , with free  
623 parameters for amplitude and spread. The two-alternative model was a Gabor function that  
624 crossed zero at the decision boundary ( $\theta_{\text{pref}} - \theta_{\text{bound}} = 0$ ) between the two possible directions.  
625 The amplitude and the spread of the model were free parameters.

$$w(\theta) = ae^{-\theta^2/2\sigma^2} \sin(x(90/\sigma)) \quad (2)$$

626 In the Gabor decoding model, for direction discrimination, the relevant weight is given by the  
627 difference between a neuron's preferred direction and the discrimination boundary between  
628 the two classes ( $\theta_{\text{pref}} - \theta_{\text{decisionBound}}$ ). The zero-crossing of the Gabor was fixed at  $\theta_{\text{pref}} -$   
629  $\theta_{\text{decisionBound}} = 0$ , and there were two additional free parameters: the gain, and the spread of  
630 the Gabor. The frequency of the sine wave was set as a ratio of the Gaussian's standard  
631 deviation, so that one full cycle fit within the Gaussian envelope. After fitting these  
632 parameters to the simulated data, we used selectivity as the gain parameter, and fixed the  
633 standard deviation at 1 to decode our neuronal populations.

### 634 Simulation

635 Populations of neurons were simulated based on the distributions of gain, bandwidth, Fano  
636 factor, and spontaneous activity that we observed in our recorded populations. A Gaussian  
637 tuning curve was produced with the specified gain, bandwidth and spontaneous level, and  
638 spike counts were generated for a given trial based on the tuning curve, Fano factor, and a  
639 Poisson spike generator. These spike counts were then decoded in the same manner as our  
640 recorded populations of neurons.

### 641 Acknowledgements

642 This work was supported by National Health and Medical Research Council Project Grants  
643 APP1008287, APP1066588 and APP1120667, Human Frontier Science Program Career

644 Development Award to N.S.C.P., the ARC SRI in Bionic Vision, and the ARC Centre of  
645 Excellence for Integrative Brain Function. We thank Janssen-Cilag Pty Limited for the  
646 donation of sufentanil citrate

## 647 References

- 648 1. Graf ABA, Kohn A, Jazayeri M, Movshon JA. Decoding the activity of neuronal  
649 populations in macaque primary visual cortex. *Nat Neurosci*. 2011 Feb;14(2):239–45.
- 650 2. Seung HS, Sompolinsky H. Simple models for reading neuronal population codes.  
651 *PNAS*. 1993 Nov 15;90(22):10749–53.
- 652 3. Shamir M. Emerging principles of population coding: in search for the neural code.  
653 *Current Opinion in Neurobiology*. 2014 Apr;25:140–8.
- 654 4. Georgopoulos AP, Schwartz AB, Kettner RE. Neuronal population coding of movement  
655 direction. *Science*. 1986 Sep 26;233(4771):1416–9.
- 656 5. Salinas E, Abbott LF. Vector reconstruction from firing rates. *J Comput Neurosci*. 1994  
657 Jun 1;1(1–2):89–107.
- 658 6. Ecker AS, Berens P, Tolias AS, Bethge M. The Effect of Noise Correlations in  
659 Populations of Diversely Tuned Neurons. *J Neurosci*. 2011 Oct 5;31(40):14272–83.
- 660 7. Jazayeri M, Movshon JA. Optimal representation of sensory information by neural  
661 populations. *Nat Neurosci*. 2006 May;9(5):690–6.
- 662 8. Pouget A, Dayan P, Zemel RS. Inference and Computation with Population Codes.  
663 *Annual Review of Neuroscience*. 2003;26(1):381–410.
- 664 9. Berens P, Ecker AS, Cotton RJ, Ma WJ, Bethge M, Tolias AS. A Fast and Simple  
665 Population Code for Orientation in Primate V1. *J Neurosci*. 2012 Aug 1;32(31):10618–  
666 26.
- 667 10. Mendoza-Halliday D, Torres S, Martinez-Trujillo JC. Sharp emergence of feature-  
668 selective sustained activity along the dorsal visual pathway. *Nat Neurosci* [Internet].  
669 2014 Aug 10 [cited 2014 Aug 12];advance online publication. Available from:  
670 [http://www.nature.com.ezproxy.lib.monash.edu.au/neuro/journal/vaop/ncurrent/full/nn.3](http://www.nature.com.ezproxy.lib.monash.edu.au/neuro/journal/vaop/ncurrent/full/nn.3785.html)  
671 [785.html](http://www.nature.com.ezproxy.lib.monash.edu.au/neuro/journal/vaop/ncurrent/full/nn.3785.html)
- 672 11. Zavitz E, Yu H-H, Rowe EG, Rosa MGP, Price NSC. Rapid Adaptation Induces  
673 Persistent Biases in Population Codes for Visual Motion. *J Neurosci*. 2016 Apr  
674 20;36(16):4579–90.
- 675 12. Schwartz O, Hsu A, Dayan P. Space and time in visual context. *Nat Rev Neurosci*.  
676 2007 Jul;8(7):522–35.
- 677 13. Glasser DM, Tsui JMG, Pack CC, Tadin D. Perceptual and neural consequences of  
678 rapid motion adaptation. *PNAS*. 2011 Nov 8;108(45):E1080–8.
- 679 14. Van Wezel RJAV, Britten KH. Motion Adaptation in Area MT. *Journal of*  
680 *Neurophysiology*. 2002 Dec 1;88(6):3469–76.

- 681 15. Chen SC, Morley JW, Solomon SG. Spatial precision of population activity in primate  
682 area MT. *Journal of Neurophysiology*. 2015 Aug 1;114(2):869–78.
- 683 16. Krekelberg B, Wezel RJA van, Albright TD. Adaptation in Macaque MT Reduces  
684 Perceived Speed and Improves Speed Discrimination. *Journal of Neurophysiology*.  
685 2006 Jan 1;95(1):255–70.
- 686 17. Price NSC, Born RT. Adaptation to Speed in Macaque Middle Temporal and Medial  
687 Superior Temporal Areas. *J Neurosci*. 2013 Mar 6;33(10):4359–68.
- 688 18. Priebe NJ, Cassanello CR, Lisberger SG. The Neural Representation of Speed in  
689 Macaque Area MT/V5. *J Neurosci*. 2003 Jul 2;23(13):5650–61.
- 690 19. Morris AP, Bremmer F, Krekelberg B. Eye-Position Signals in the Dorsal Visual System  
691 Are Accurate and Precise on Short Timescales. *Journal of Neuroscience*.  
692 2013;33(30):12395–12406.
- 693 20. Maunsell JH, Van Essen DC. Functional properties of neurons in middle temporal  
694 visual area of the macaque monkey. II. Binocular interactions and sensitivity to  
695 binocular disparity. *Journal of Neurophysiology*. 1983 May 1;49(5):1148–67.
- 696 21. Uka T, DeAngelis GC. Contribution of Middle Temporal Area to Coarse Depth  
697 Discrimination: Comparison of Neuronal and Psychophysical Sensitivity. *J Neurosci*.  
698 2003 Apr 15;23(8):3515–30.
- 699 22. Bourne JA, Rosa MGP. Preparation for the in vivo recording of neuronal responses in  
700 the visual cortex of anaesthetised marmosets (*Callithrix jacchus*). *Brain Res Brain Res*  
701 *Protoc*. 2003 Jul;11(3):168–77.
- 702 23. Yu H-H, Rosa MGP. Uniformity and diversity of response properties of neurons in the  
703 primary visual cortex: selectivity for orientation, direction of motion, and stimulus size  
704 from center to far periphery. *Vis Neurosci*. 2014 Jan;31(1):85–98.
- 705 24. Friedman J, Hastie T, Tibshirani R. Regularization Paths for Generalized Linear Models  
706 via Coordinate Descent. *J Stat Softw*. 2010;33(1):1–22.
- 707 25. Qian J, Hastie T, Friedman J, Tibshirani R, Simon N. *Glmnet for Matlab*.  
708 [http://www.stanford.edu/~hastie/glmnet\\_matlab/](http://www.stanford.edu/~hastie/glmnet_matlab/); 2013.

709

## 710 Supplementary Information

711

|            | <b>12 AFC</b> | <b>2 AFC 90</b> | <b>2 AFC 30</b> |
|------------|---------------|-----------------|-----------------|
| <b>130</b> |               |                 |                 |
| DSI        | 0.72          | 0.12            | 0.22            |
| Gain       | -0.10         | 0.37            | 0.12            |
| FF         | -0.24         | -0.15           | -0.11           |
| BW         | -0.23         | -0.04           | -0.14           |
| <b>40</b>  |               |                 |                 |
| DSI        | 0.62          | 0.32            | 0.26            |
| Gain       | 0.27          | 0.21            | 0.09            |

|           |       |       |       |
|-----------|-------|-------|-------|
| FF        | -0.36 | -0.21 | -0.15 |
| BW        | -0.23 | -0.13 | -0.17 |
| <b>20</b> |       |       |       |
| DSI       | 0.60  | 0.40  | 0.31  |
| Gain      | 0.32  | 0.12  | 0.14  |
| FF        | -0.37 | -0.23 | -0.21 |
| BW        | -0.10 | -0.07 | -0.15 |

712 **Supplementary Table 1: Summary of Spearman's partial correlation coefficients for all**  
 713 **decoders and population sizes.**

714

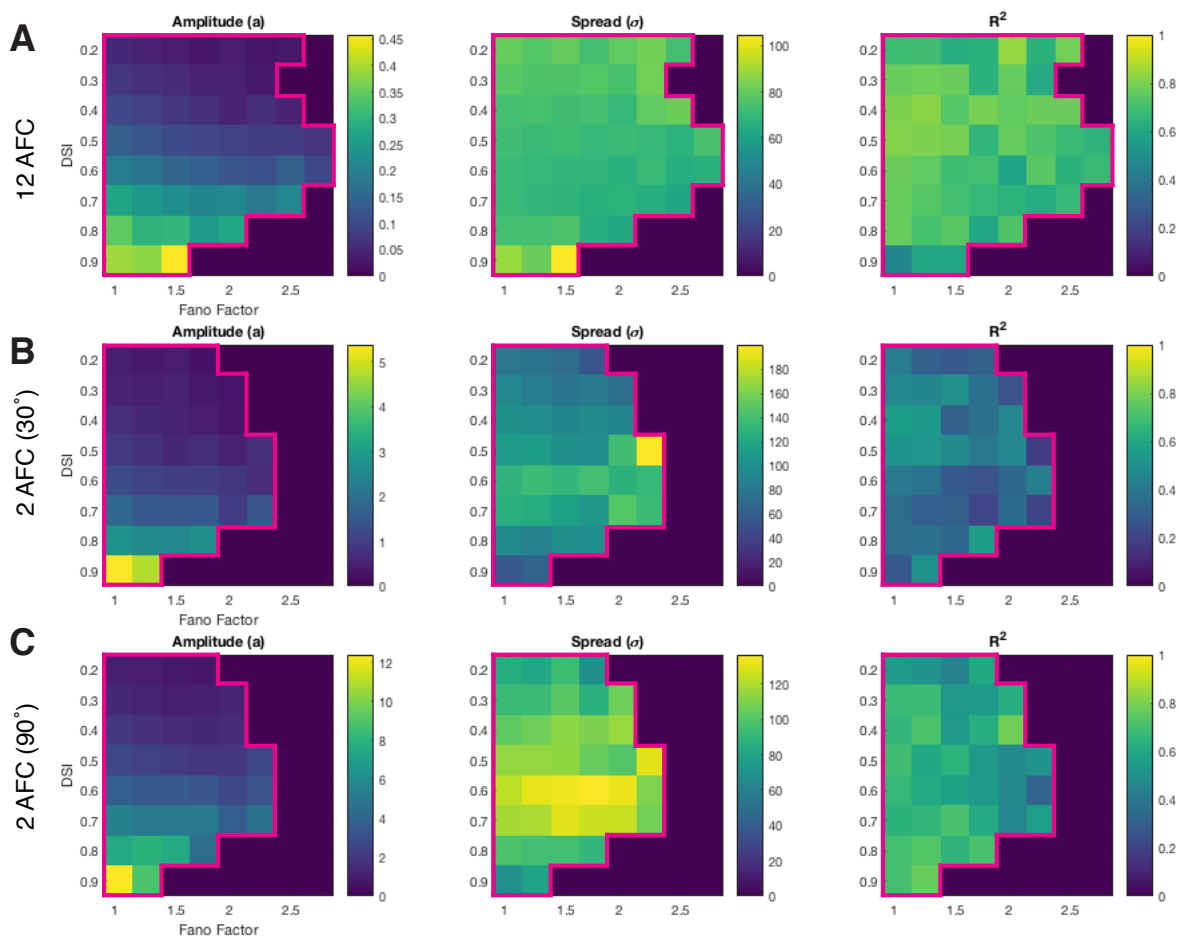

715

716 **Supplementary Figure 1: Selectivity and Fano factor are reflected in the amplitude of**  
 717 **the weighting functions. (A)** Left: The amplitude parameter of the Gaussian model  
 718 (intensity) for neurons with each pairing of Fano factor and selectivity. There is a smooth  
 719 amplitude gradient with respect to both Fano factor and DSI. Centre: The spread parameter  
 720 of the Gaussian model. The relationship between spread and the parameters of interest is  
 721 not as systematic as the amplitude, but there seems to be a narrower spread in conditions  
 722 where Fano factor and selectivity are both moderate. Areas outside of the pink boundary  
 723 indicate pairings of properties where there were fewer than thirteen weights (and so only one  
 724 or no simulated neurons). Right:  $R^2$  for the models from which amplitude and spread were

725 derived. **(B)** As in A for the amplitude and spread of the Gabor model in the 30° two-  
726 alternative discrimination. **(C)** As in A for the 90° two-alternative discrimination model. Fits  
727 were achieved with a five-parameter second-order surface where  $f(x,y) = a + bx + cy + dxy +$   
728  $ey^2$ . The quadratic term was required for direction selectivity (y), but not for Fano factor.
